# Supplementary material
Source: PubMed Central journal article supplement (PMC7878356)
Supplement: NIHMS1656867-supplement-Supplemental_Publication_Material.pdf [file NIHMS1656867-supplement-Supplemental_Publication_Material.pdf]

## DATA SUPPLEMENT

### Early but Not Late Onset Hypertension is Related to Midlife Cognitive Function

Karri Suvila MD,<sup>1</sup> Joao A.C. Lima,<sup>2</sup> Yuichiro Yano MD, PhD,<sup>3</sup>

Zaldy S. Tan MD, MPH,<sup>4</sup> Susan Cheng MD, MPH,<sup>5,6,7</sup> Teemu J. Niiranen MD<sup>1,8</sup>

1. Division of Medicine, Turku University Hospital and University of Turku, Turku, Finland
2. Division of Cardiology, Johns Hopkins University, Baltimore, Maryland
3. Department of Family Medicine and Community Health, Duke University, Durham, USA
4. Jona Goldrich Center for Alzheimer's and Memory Disorders, Department of Neurology, Cedars-Sinai Medical Center, Los Angeles, USA
5. Division of Medicine, Department of Medicine, Brigham and Women's Hospital, Boston, USA
6. Smidt Heart Institute, Cedars-Sinai Medical Center, Los Angeles, USA
7. Framingham Heart Study, Framingham, USA
8. Department of Public Health Solutions, Finnish Institute for Health and Welfare, Turku, Finland

Short title: Early-Onset Hypertension and Cognition

Author Responsible for Correspondence: Karri Suvila, Department of Internal Medicine, Kiinamylynkatu 4-8, 20014 University of Turku, Finland; email: kaheuv@utu.fi; telephone: +358 2 313 0000

**Table S1.** Comparison of characteristics between study sample and excluded participants at baseline (Year 0).

| Characteristic                         | N(included/<br>excluded) | Included<br>participants | Excluded<br>participants | p-value |
|----------------------------------------|--------------------------|--------------------------|--------------------------|---------|
| Age, years (SD)                        | 2946/2167                | 25.0 (3.6)               | 24.6 (3.7)               | <0.001  |
| Women, (%)                             | 2946/2167                | 1689 (57.3)              | 1097 (50.6)              | <0.001  |
| Black race, n (%)                      | 2946/2165                | 1373 (46.6)              | 1269 (58.6)              | <0.001  |
| Body mass index, kg/m <sup>2</sup>     | 2937/2159                | 20.6 (4.0)               | 21.0 (4.4)               | <0.01   |
| Current smoker, n (%)                  | 2930/2147                | 740 (25.3)               | 804 (37.5)               | <0.001  |
| Total cholesterol, mmol/l              | 2922/2142                | 4.6 (0.9)                | 4.6 (0.9)                | 0.07    |
| HDL-cholesterol, mmol/l                | 2922/2142                | 1.4 (0.3)                | 1.4 (0.4)                | <0.001  |
| Systolic blood pressure, mmHg          | 2946/2167                | 110 (10)                 | 111 (11)                 | <0.001  |
| Diastolic blood pressure, mmHg         | 2946/2167                | 68.2 (9.0)               | 68.5 (10.2)              | 0.26    |
| Antihypertensive medication use, n (%) | 2944/2163                | 53 (1.8)                 | 62 (2.9)                 | <0.05   |
| Diabetes, n (%)                        | 2946/2167                | 9 (0.3)                  | 21 (1.0)                 | <0.01   |
| Alcohol intake, ml/day (median, IQR)   | 2935/2157                | 4.8 (0-14.5)             | 4.8 (0-15.1)             | <0.001  |
| Education, years                       | 2946/2164                | 13.9 (1.8)               | 13.2 (1.8)               | <0.001  |
| Sedentary time, h/day                  | N/A                      | N/A                      | N/A                      |         |

SD, standard deviation; IQR, interquartile range, BMI, body mass index; HDL, high density lipoprotein. Sedentary behavior time was not assessed at baseline.

**Table S2.** Mean unadjusted brain MRI measures at Year 30 exam according to hypertension onset age.

|                                           | All              | HTN Onset Age    |                  |                  | No HTN           | p-value |
|-------------------------------------------|------------------|------------------|------------------|------------------|------------------|---------|
|                                           |                  | <35 y            | 35–44 y          | ≥45 y            |                  |         |
| N                                         | 599              | 18               | 41               | 78               | 462              | -       |
| Total brain volume, cm <sup>3</sup>       | 1162 (123)       | 1061 (108)       | 1130 (121)       | 1141 (118)       | 1172 (123)       | <0.001  |
| White matter volume, cm <sup>3</sup>      | 529 (65)         | 485 (63)         | 518 (60)         | 521 (64)         | 533 (64)         | 0.005   |
| Grey matter volume, cm <sup>3</sup>       | 633 (64)         | 576 (54)         | 612 (66)         | 620 (60)         | 639 (64)         | <0.001  |
| AWM volume, cm <sup>3</sup> (median, IQR) | 0.55 (0.25–1.17) | 0.46 (0.29–1.62) | 0.93 (0.32–2.17) | 0.69 (0.29–1.45) | 0.52 (0.23–1.12) | 0.25    |
| WMFA                                      | 0.30 (0.02)      | 0.30 (0.02)      | 0.30 (0.02)      | 0.30 (0.02)      | 0.31 (0.02)      | 0.05    |

Values are reported as mean (SD) unless otherwise stated. HTN, hypertension; y, years; AWM, abnormal white matter; IQR, interquartile range; WMFA, white matter fractional anisotropy.

**Table S3.** Association between hypertension onset age and cognitive performance at Year 30 by sex.

| Age of HTN onset | N    | Cognitive function tests |             |             |                           |             |
|------------------|------|--------------------------|-------------|-------------|---------------------------|-------------|
|                  |      | RAVLT                    | DSST        | Stroop test | Composite cognitive score | MoCA        |
| <b>Men</b>       |      |                          |             |             |                           |             |
|                  | 1257 |                          |             |             |                           |             |
| <35 years        | 53   | -0.18±0.14               | -0.25±0.12‡ | -0.22±0.15  | -0.22±0.09‡               | -0.22±0.13  |
| 35–44 years      | 115  | 0.00±0.11                | 0.06±0.10   | -0.10±0.12  | -0.01±0.07                | -0.08±0.10  |
| ≥45 years        | 186  | -0.05±0.10               | -0.15±0.08  | -0.22±0.10‡ | -0.14±0.07‡               | -0.02±0.09  |
| No HTN           | 903  | Ref.                     | Ref.        | Ref.        | Ref.                      | Ref.        |
| <b>Women</b>     |      |                          |             |             |                           |             |
|                  | 1689 |                          |             |             |                           |             |
| <35 years        | 59   | -0.03±0.13               | -0.26±0.13‡ | -0.24±0.13  | -0.18±0.09§               | -0.33±0.12† |
| 35–44 years      | 162  | -0.12±0.09               | -0.10±0.09  | -0.07±0.10  | -0.09±0.07                | -0.08±0.09  |
| ≥45 years        | 240  | -0.02±0.08               | -0.01±0.08  | -0.01±0.08  | -0.01±0.06                | 0.08±0.08   |
| No HTN           | 1228 | Ref.                     | Ref.        | Ref.        | Ref.                      | Ref.        |

Data presented as beta ( $\beta$ ) with standard error. All models are adjusted for age, race, education, diabetes, body mass index, smoking, alcohol intake, sedentary time, use of antihypertensive medication, and systolic blood pressure. \* $P < 0.001$ , † $P < 0.01$ , ‡ $P < 0.05$ , § $P = 0.05$ . HTN, hypertension; DSST, Digit Symbol Substitution test; RAVLT, Rey Auditory Verbal Learning test; MoCA, Montreal Cognitive Assessment.

**Table S4.** Association between hypertension onset age and cognitive performance at Year 30 according by race.

| Age of HTN onset  | N    | Cognitive function tests |            |             |                           |             |
|-------------------|------|--------------------------|------------|-------------|---------------------------|-------------|
|                   |      | RAVLT                    | DSST       | Stroop test | Composite cognitive score | MoCA        |
| <b>Black race</b> |      |                          |            |             |                           |             |
| <35 years         | 87   | -0.14±0.11               | -0.21±0.11 | -0.11±0.14  | -0.16±0.09                | -0.24±0.12‡ |
| 35–44 years       | 203  | -0.13±0.09               | -0.01±0.09 | -0.06±0.11  | -0.07±0.07                | -0.03±0.09  |
| ≥45 years         | 261  | -0.09±0.08               | -0.07±0.08 | -0.08±0.10  | -0.08±0.06                | 0.07±0.09   |
| No HTN            | 822  | Ref.                     | Ref.       | Ref.        | Ref.                      | Ref.        |
| <b>White race</b> |      |                          |            |             |                           |             |
| <35 years         | 25   | -0.13±0.18               | -0.24±0.17 | -0.47±0.15† | -0.28±0.12‡               | -0.30±0.15‡ |
| 35–44 years       | 74   | -0.02±0.12               | -0.10±0.11 | -0.11±0.10  | -0.08±0.08                | -0.15±0.10  |
| ≥45 years         | 165  | 0.07±0.10                | -0.06±0.09 | -0.12±0.08  | -0.04±0.06                | 0.01±0.08   |
| No HTN            | 1309 | Ref.                     | Ref.       | Ref.        | Ref.                      | Ref.        |

Data presented as beta ( $\beta$ ) with standard error. All models are adjusted for age, race, education, diabetes, body mass index, smoking, alcohol intake, sedentary time, use of antihypertensive medication, and systolic blood pressure. \* $P < 0.001$ , † $P < 0.01$ , ‡ $P < 0.05$ . HTN, hypertension; DSST, Digit Symbol Substitution test; RAVLT, Rey Auditory Verbal Learning test; MoCA, Montreal Cognitive Assessment.

**Table S5.** Association between hypertension onset age and cognitive performance at Year 30 using an alternative age of hypertension onset definition.

| Age of HTN onset                | N    | Cognitive function tests |             |             |                           |             |
|---------------------------------|------|--------------------------|-------------|-------------|---------------------------|-------------|
|                                 |      | RAVLT                    | DSST        | Stroop test | Composite cognitive score | MoCA        |
| <b>Unadjusted model</b>         |      |                          |             |             |                           |             |
| <35 years                       | 64   | -0.54±0.12*              | -0.74±0.12* | -0.33±0.12† | -0.54±0.09*               | -0.63±0.12* |
| 35–44 years                     | 74   | -0.57±0.12*              | -0.55±0.11* | -0.54±0.11* | -0.56±0.09*               | -0.54±0.11* |
| ≥45 years                       | 95   | -0.32±0.10†              | -0.49±0.10* | -0.49±0.10* | -0.43±0.08*               | -0.42±0.10* |
| No HTN                          | 2713 | Ref.                     | Ref.        | Ref.        | Ref.                      | Ref.        |
| <b>Minimally adjusted model</b> |      |                          |             |             |                           |             |
| <35 years                       | 64   | -0.17±0.11               | -0.36±0.11* | -0.11±0.11  | -0.21±0.08†               | -0.24±0.10‡ |
| 35–44 years                     | 74   | -0.24±0.10‡              | -0.21±0.10‡ | -0.31±0.11† | -0.25±0.07*               | -0.14±0.09  |
| ≥45 years                       | 95   | 0.00±0.09                | -0.15±0.09  | -0.24±0.09† | 0.13±0.06‡                | -0.02±0.08  |
| No HTN                          | 2713 | Ref.                     | Ref.        | Ref.        | Ref.                      | Ref.        |
| <b>Fully adjusted model</b>     |      |                          |             |             |                           |             |
| <35 years                       | 64   | -0.07±0.11               | -0.25±0.11‡ | -0.04±0.12  | -0.12±0.08                | -0.15±0.10  |
| 35–44 years                     | 74   | -0.15±0.10               | -0.11±0.10  | -0.23±0.11‡ | -0.17±0.07‡               | -0.04±0.10  |
| ≥45 years                       | 95   | 0.08±0.09                | -0.07±0.09  | -0.14±0.10  | -0.04±0.06                | 0.08±0.09   |
| No HTN                          | 2713 | Ref.                     | Ref.        | Ref.        | Ref.                      | Ref.        |

Hypertension onset age defined here only as BP≥140/90 on two consecutive visits without considering antihypertensive medication use. Data presented as beta ( $\beta$ ) with standard error. Minimally adjusted model is adjusted for age, race, and education. Fully adjusted model age, race, education, diabetes, body mass index, smoking, alcohol intake, sedentary time, use of antihypertensive medication, and systolic blood pressure. \*P<0.001, †P<0.01, ‡P<0.05. HTN, hypertension; DSST, Digit Symbol Substitution test; RAVLT, Rey Auditory Verbal Learning test; MoCA, Montreal Cognitive Assessment.

**Table S6.** Association ( $\beta \pm SE$ ) of hypertension onset age with structural brain changes at Year 30.

| Age of hypertension onset | Total brain volume | White matter volume | Grey matter volume | AWM volume | WMFA        |
|---------------------------|--------------------|---------------------|--------------------|------------|-------------|
| N                         | 599                | 599                 | 599                | 599        | 599         |
| Unadjusted model          |                    |                     |                    |            |             |
| <35 years                 | -0.90±0.24*        | -0.76±0.24†         | -0.97±0.23*        | 0.06±0.24  | -0.23±0.23  |
| 35–44 years               | -0.34±0.16‡        | -0.24±0.16          | -0.41±0.16‡        | 0.29±0.16  | -0.27±0.16  |
| ≥45 years                 | -0.25±0.12‡        | -0.19±0.12          | -0.30±0.12‡        | 0.14±0.12  | -0.26±0.12‡ |
| No hypertension           | Ref.               | Ref.                | Ref.               | Ref.       | Ref.        |
| Minimally adjusted model  |                    |                     |                    |            |             |
| <35 years                 | -0.08±0.07         | 0.04±0.08           | -0.19±0.11         | -0.02±0.25 | 0.05±0.23   |
| 35–44 years               | -0.02±0.05         | 0.04±0.05           | -0.08±0.08         | 0.20±0.17  | -0.15±0.16  |
| ≥45 years                 | -0.06±0.04         | -0.03±0.04          | -0.07±0.06         | 0.08±0.13  | -0.18±0.12  |
| No hypertension           | Ref.               | Ref.                | Ref.               | Ref.       | Ref.        |
| Fully adjusted model      |                    |                     |                    |            |             |
| <35 years                 | -0.08±0.08         | 0.09±0.09           | -0.24±0.13         | -0.21±0.27 | 0.22±0.26   |
| 35–44 years               | -0.02±0.06         | 0.07±0.07           | -0.10±0.09         | 0.04±0.20  | 0.01±0.19   |
| ≥45 years                 | -0.04±0.05         | 0.01±0.06           | -0.09±0.08         | -0.14±0.17 | 0.03±0.16   |
| No hypertension           | Ref.               | Ref.                | Ref.               | Ref.       | Ref.        |

Values are for 1-SD difference estimate (beta) with standard error. Minimally adjusted model is adjusted for intracranial volume, age, sex, race, and education. Fully adjusted model is adjusted for intracranial volume, age, sex, race, education, diabetes, body mass index, smoking, alcohol intake, sedentary time, use of antihypertensive medication, and systolic blood pressure. \* $P < 0.001$ , † $P < 0.01$ , ‡ $P < 0.05$ . AWM, abnormal white matter; WMFA, white matter fractional anisotropy.

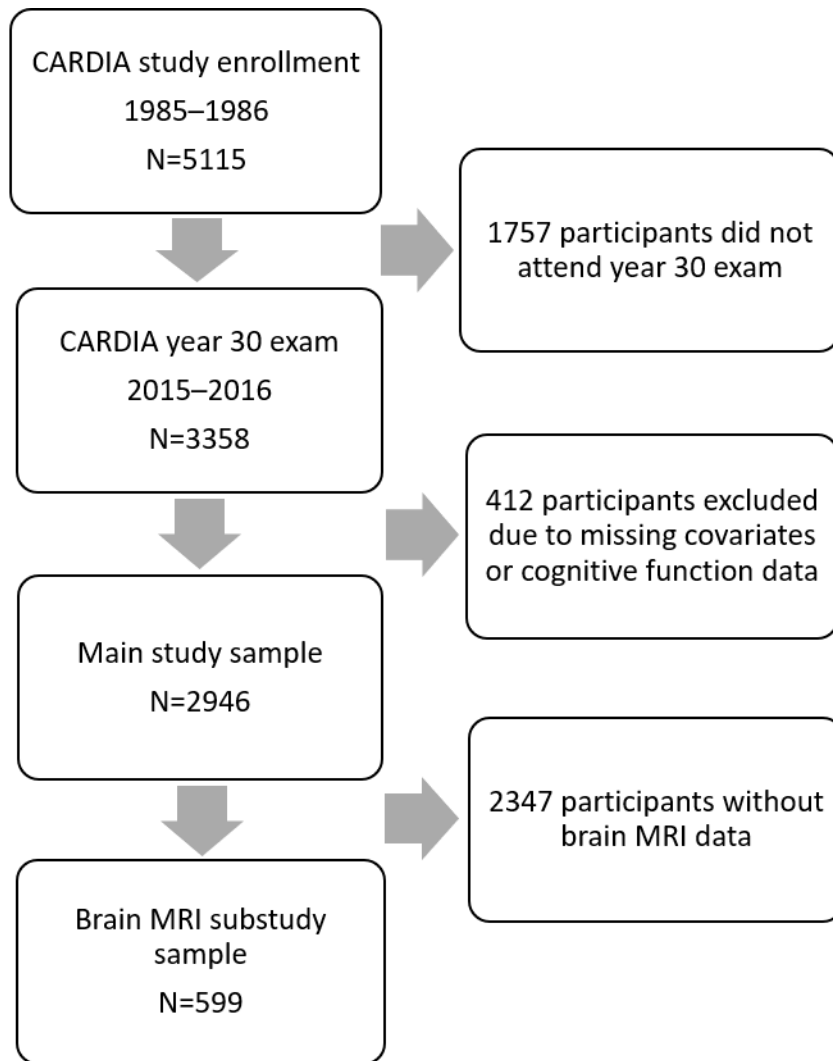

**Figure S1.** Study flow chart illustrating the flow of the CARDIA study participants through follow-up and the excluded participants.
